# Supplementary material for: Evaluation of silver nanoparticles for the prevention of SARS-CoV-2 infection in health workers: In vitro and in vivo
Source: PubMed Central journal article supplement (PMC8375774; doi:10.1371/journal.pone.0256401), 2021-08-19
Supplement: pone.0256401.s002.pdf [file pone.0256401.s002.pdf]

| #   | COVID 19 +<br>(Positive /<br>Negative) | Gender<br>(Female /<br>Male) | Age (X) | Occupation<br>(Doctor / Nurse /<br>Administrative) | Marital Status<br>(Single / Married /<br>Common Union /<br>Widowed /<br>Divorced) | Smoking<br>habits (Current<br>/ Previous /<br>Never) | Seasonal<br>Influenza<br>Vaccine<br>(Yes / No) | Body Mass<br>Index<br>(BMI), (X) | Weight | Height | Type 2<br>diabetes<br>mellitus<br>(DM), (Yes<br>/ No) | Arterial<br>hypertensi<br>on (HTN),<br>(Yes / No) | Asthma,<br>(Yes /<br>No) | Other<br>diseases | Hand<br>washing<br>before study<br>protocol (X) | Daily gargles<br>before the<br>study<br>protocol (X) | Frequency of upper<br>respiratory tract<br>infections before (last<br>year) of being<br>incorporated into the<br>study protocol (X) | Hand<br>washing<br>during the<br>study<br>protocol (x) | Daily gargles<br>with the oral<br>and nasal<br>hygiene<br>product during<br>the study week<br>(Daily average) | Direct daily<br>application<br>of the oral<br>and nasal<br>hygiene<br>product during<br>the study:<br>Daily nasal<br>rinses with<br>the oral and<br>nasal<br>hygiene<br>product during<br>the study week<br>(Daily<br>average) | Time in<br>hours<br>working in<br>the HGT | How many patients<br>were in contact<br>with the diagnosis<br>of atypical<br>pneumonia or<br>COVID-19 disease<br>during the last<br>week (Weekly<br>Average) | What<br>protective<br>equipment<br>was used to<br>prevent<br>infection | Had any<br>symptoms<br>of<br>respiratory<br>tract<br>infections | Adverse reactions<br>reported from<br>using the oral and<br>nasal hygiene<br>product |    |
|-----|----------------------------------------|------------------------------|---------|----------------------------------------------------|-----------------------------------------------------------------------------------|------------------------------------------------------|------------------------------------------------|----------------------------------|--------|--------|-------------------------------------------------------|---------------------------------------------------|--------------------------|-------------------|-------------------------------------------------|------------------------------------------------------|-------------------------------------------------------------------------------------------------------------------------------------|--------------------------------------------------------|---------------------------------------------------------------------------------------------------------------|--------------------------------------------------------------------------------------------------------------------------------------------------------------------------------------------------------------------------------|-------------------------------------------|--------------------------------------------------------------------------------------------------------------------------------------------------------------|------------------------------------------------------------------------|-----------------------------------------------------------------|--------------------------------------------------------------------------------------|----|
| 73  | Negative                               | M                            | 25      | Nurse                                              | Single                                                                            | Never                                                | Yes                                            | 23.46                            | 67     | 1.69   | No                                                    | No                                                | No                       | No                | 3                                               | 2                                                    | 0                                                                                                                                   | 4                                                      | 1.78                                                                                                          | 0.44                                                                                                                                                                                                                           | 7                                         | 0                                                                                                                                                            | PPE                                                                    | No                                                              | No                                                                                   |    |
| 74  | Negative                               | F                            | 28      | Nurse                                              | Married                                                                           | Never                                                | Yes                                            | 24.00                            | 71     | 1.72   | No                                                    | No                                                | No                       | No                | 2                                               | 2                                                    | 0                                                                                                                                   | 4                                                      | 8.00                                                                                                          | 8.00                                                                                                                                                                                                                           | 8                                         | 66                                                                                                                                                           | PPE                                                                    | No                                                              | No                                                                                   |    |
| 75  | Negative                               | F                            | 36      | Nurse                                              | Single                                                                            | Never                                                | Yes                                            | 24.22                            | 62     | 1.60   | No                                                    | No                                                | Yes                      | No                | 3                                               | 2                                                    | 2                                                                                                                                   | 3                                                      | 1.11                                                                                                          | 0.22                                                                                                                                                                                                                           | 8                                         | 216                                                                                                                                                          | PPE                                                                    | Yes                                                             | No                                                                                   |    |
| 76  | Negative                               | F                            | 25      | Nurse                                              | Single                                                                            | Previous                                             | Yes                                            | 24.09                            | 68     | 1.68   | No                                                    | No                                                | No                       | No                | 20                                              | 2                                                    | 3                                                                                                                                   | 20                                                     | 12.78                                                                                                         | 0.00                                                                                                                                                                                                                           | 12                                        | 334                                                                                                                                                          | PPE                                                                    | No                                                              | No                                                                                   |    |
| 77  | Negative                               | F                            | 24      | Nurse                                              | Single                                                                            | Never                                                | Yes                                            | 20.82                            | 56     | 1.64   | No                                                    | No                                                | No                       | No                | 3                                               | 1                                                    | 1                                                                                                                                   | 1                                                      | 1.00                                                                                                          | 2.78                                                                                                                                                                                                                           | 8                                         | 54                                                                                                                                                           | PPE                                                                    | No                                                              | No                                                                                   |    |
| 78  | Negative                               | M                            | 32      | Doctor                                             | Married                                                                           | Never                                                | Yes                                            | 24.49                            | 75     | 1.75   | No                                                    | No                                                | No                       | No                | 3                                               | 1                                                    | 2                                                                                                                                   | 8                                                      | 3.00                                                                                                          | 3.00                                                                                                                                                                                                                           | 1.00                                      | 7                                                                                                                                                            | 270                                                                    | PPE                                                             | No                                                                                   | No |
| 79  | Negative                               | F                            | 30      | Nurse                                              | Married                                                                           | Never                                                | No                                             | 24.89                            | 56     | 1.50   | No                                                    | No                                                | No                       | No                | 8                                               | 2                                                    | 2                                                                                                                                   | 10                                                     | 4.00                                                                                                          | 28.00                                                                                                                                                                                                                          | 0.40                                      | 7                                                                                                                                                            | 81                                                                     | PPE                                                             | No                                                                                   | No |
| 80  | Negative                               | F                            | 20      | Nurse                                              | Single                                                                            | Never                                                | Yes                                            | 20.00                            | 45     | 1.50   | No                                                    | No                                                | No                       | No                | 5                                               | 2                                                    | 0                                                                                                                                   | 7                                                      | 5.00                                                                                                          | 35.00                                                                                                                                                                                                                          | 1.00                                      | 7                                                                                                                                                            | 135                                                                    | PPE                                                             | No                                                                                   | No |
| 81  | Negative                               | M                            | 60      | Doctor                                             | Single                                                                            | Never                                                | No                                             | 25.24                            | 63     | 1.58   | No                                                    | No                                                | No                       | No                | 6                                               | 2                                                    | 1                                                                                                                                   | 15                                                     | 5.00                                                                                                          | 33.67                                                                                                                                                                                                                          | 1.00                                      | 8                                                                                                                                                            | 235                                                                    | PPE                                                             | No                                                                                   | No |
| 82  | Negative                               | F                            | 65      | Administrative                                     | Widowed                                                                           | Never                                                | No                                             | 26.67                            | 60     | 1.50   | No                                                    | No                                                | No                       | No                | 7                                               | 2                                                    | 1                                                                                                                                   | 10                                                     | 6.78                                                                                                          | 29.89                                                                                                                                                                                                                          | 0.60                                      | 15                                                                                                                                                           | 135                                                                    | PPE                                                             | No                                                                                   | No |
| 83  | Negative                               | M                            | 52      | Doctor                                             | Single                                                                            | Previous                                             | No                                             | 22.84                            | 66     | 1.70   | No                                                    | No                                                | No                       | No                | 6                                               | 2                                                    | 0                                                                                                                                   | 10                                                     | 3.00                                                                                                          | 3.00                                                                                                                                                                                                                           | 0.60                                      | 8                                                                                                                                                            | 63                                                                     | PPE                                                             | No                                                                                   | No |
| 84  | Negative                               | F                            | 20      | Nurse                                              | Single                                                                            | Never                                                | No                                             | 18.29                            | 48     | 1.62   | No                                                    | No                                                | No                       | No                | 4                                               | 0                                                    | 0                                                                                                                                   | 10                                                     | 3.00                                                                                                          | 4.00                                                                                                                                                                                                                           | 0.60                                      | 8                                                                                                                                                            | 65                                                                     | PPE                                                             | No                                                                                   | No |
| 85  | Negative                               | F                            | 58      | Nurse                                              | Married                                                                           | Previous                                             | No                                             | 29.33                            | 66     | 1.50   | No                                                    | No                                                | No                       | No                | 7                                               | 0                                                    | 0                                                                                                                                   | 10                                                     | 3.00                                                                                                          | 3.00                                                                                                                                                                                                                           | 1.00                                      | 8                                                                                                                                                            | 86                                                                     | PPE                                                             | No                                                                                   | No |
| 86  | Negative                               | F                            | 62      | Nurse                                              | Single                                                                            | Never                                                | Yes                                            | 28.54                            | 60     | 1.45   | No                                                    | No                                                | No                       | No                | 3                                               | 0                                                    | 0                                                                                                                                   | 10                                                     | 3.00                                                                                                          | 3.00                                                                                                                                                                                                                           | 1.00                                      | 8                                                                                                                                                            | 105                                                                    | PPE                                                             | No                                                                                   | No |
| 87  | Negative                               | M                            | 49      | Administrative                                     | Married                                                                           | Never                                                | Yes                                            | 24.61                            | 63     | 1.60   | No                                                    | No                                                | No                       | No                | 3                                               | 0                                                    | 0                                                                                                                                   | 6                                                      | 3.00                                                                                                          | 3.00                                                                                                                                                                                                                           | 0.60                                      | 8                                                                                                                                                            | 169                                                                    | PPE                                                             | No                                                                                   | No |
| 88  | Negative                               | M                            | 61      | Doctor                                             | Widowed                                                                           | Never                                                | No                                             | 22.49                            | 65     | 1.70   | Yes                                                   | Yes                                               | No                       | No                | 3                                               | 0                                                    | 0                                                                                                                                   | 10                                                     | 3.00                                                                                                          | 3.00                                                                                                                                                                                                                           | 0.60                                      | 8                                                                                                                                                            | 106                                                                    | PPE                                                             | No                                                                                   | No |
| 89  | Negative                               | M                            | 43      | Administrative                                     | Married                                                                           | Never                                                | No                                             | 23.78                            | 72     | 1.74   | No                                                    | No                                                | No                       | No                | 3                                               | 0                                                    | 0                                                                                                                                   | 8                                                      | 3.00                                                                                                          | 3.00                                                                                                                                                                                                                           | 0.40                                      | 8                                                                                                                                                            | 86                                                                     | PPE                                                             | No                                                                                   | No |
| 90  | Negative                               | F                            | 63      | Administrative                                     | Married                                                                           | Never                                                | No                                             | 22.22                            | 50     | 1.50   | No                                                    | No                                                | No                       | No                | 3                                               | 0                                                    | 0                                                                                                                                   | 10                                                     | 3.00                                                                                                          | 3.00                                                                                                                                                                                                                           | 0.40                                      | 8                                                                                                                                                            | 89                                                                     | PPE                                                             | No                                                                                   | No |
| 91  | Negative                               | M                            | 47      | Doctor                                             | Married                                                                           | Never                                                | No                                             | 26.12                            | 80     | 1.75   | No                                                    | No                                                | No                       | No                | 3                                               | 0                                                    | 0                                                                                                                                   | 10                                                     | 3.56                                                                                                          | 3.56                                                                                                                                                                                                                           | 0.40                                      | 8                                                                                                                                                            | 231                                                                    | PPE                                                             | No                                                                                   | No |
| 92  | Positive                               | M                            | 30      | Nurse                                              | Single                                                                            | Never                                                | Yes                                            | 27.08                            | 82     | 1.74   | No                                                    | No                                                | No                       | No                | 3                                               | 2                                                    | 0                                                                                                                                   | 3                                                      | 9.56                                                                                                          | 4.78                                                                                                                                                                                                                           | 1.00                                      | 12                                                                                                                                                           | 2                                                                      | PPE                                                             | No                                                                                   | No |
| 93  | Positive                               | F                            | 27      | Nurse                                              | Single                                                                            | Never                                                | Yes                                            | 28.26                            | 76     | 1.64   | No                                                    | No                                                | No                       | No                | 20                                              | 0                                                    | 3                                                                                                                                   | 20                                                     | 1.50                                                                                                          | 0.67                                                                                                                                                                                                                           | 1.00                                      | 12                                                                                                                                                           | 20                                                                     | PPE                                                             | Yes                                                                                  | No |
| 94  | Negative                               | F                            | 33      | Nurse                                              | Married                                                                           | Never                                                | Yes                                            | 23.44                            | 60     | 1.60   | No                                                    | No                                                | No                       | No                | 5                                               | 4                                                    | 0                                                                                                                                   | 5                                                      | 4.00                                                                                                          | 6.89                                                                                                                                                                                                                           | 0.40                                      | 7                                                                                                                                                            | 270                                                                    | PPE                                                             | Yes                                                                                  | No |
| 95  | Negative                               | M                            | 32      | Nurse                                              | Married                                                                           | Never                                                | Yes                                            | 24.39                            | 73     | 1.73   | No                                                    | No                                                | No                       | No                | 2                                               | 0                                                    | 0                                                                                                                                   | 2                                                      | 2.78                                                                                                          | 0.00                                                                                                                                                                                                                           | 0.00                                      | 12                                                                                                                                                           | 448                                                                    | PPE                                                             | No                                                                                   | No |
| 96  | Negative                               | F                            | 30      | Nurse                                              | Married                                                                           | Never                                                | Yes                                            | 28.23                            | 75     | 1.63   | No                                                    | No                                                | No                       | No                | 0                                               | 0                                                    | 1                                                                                                                                   | 0                                                      | 0.44                                                                                                          | 1.56                                                                                                                                                                                                                           | 1.00                                      | 12                                                                                                                                                           | 318                                                                    | PPE                                                             | No                                                                                   | No |
| 97  | Negative                               | F                            | 37      | Nurse                                              | Married                                                                           | Never                                                | Yes                                            | 28.44                            | 72.8   | 1.60   | No                                                    | No                                                | No                       | No                | 3                                               | 1                                                    | 0                                                                                                                                   | 2                                                      | 0.00                                                                                                          | 2.00                                                                                                                                                                                                                           | 0.00                                      | 6                                                                                                                                                            | 63                                                                     | PPE                                                             | No                                                                                   | No |
| 98  | Negative                               | M                            | 32      | Nurse                                              | Single                                                                            | Never                                                | Yes                                            | 27.68                            | 80     | 1.70   | No                                                    | No                                                | No                       | No                | 3                                               | 0                                                    | 0                                                                                                                                   | 0                                                      | 0.44                                                                                                          | 2.00                                                                                                                                                                                                                           | 0.40                                      | 12                                                                                                                                                           | 404                                                                    | PPE                                                             | No                                                                                   | No |
| 99  | Negative                               | M                            | 32      | Nurse                                              | Married                                                                           | Never                                                | Yes                                            | 27.04                            | 80     | 1.72   | No                                                    | No                                                | No                       | No                | 3                                               | 0                                                    | 0                                                                                                                                   | 0                                                      | 0.00                                                                                                          | 2.00                                                                                                                                                                                                                           | 0.00                                      | 12                                                                                                                                                           | 456                                                                    | PPE                                                             | No                                                                                   | No |
| 100 | Negative                               | F                            | 30      | Nurse                                              | Single                                                                            | Never                                                | Yes                                            | 30.11                            | 80     | 1.63   | No                                                    | No                                                | No                       | No                | 3                                               | 0                                                    | 0                                                                                                                                   | 0                                                      | 1.11                                                                                                          | 0.89                                                                                                                                                                                                                           | 1.00                                      | 12                                                                                                                                                           | 248                                                                    | PPE                                                             | No                                                                                   | No |
| 101 | Negative                               | M                            | 30      | Nurse                                              | Single                                                                            | Never                                                | Yes                                            | 28.40                            | 85     | 1.73   | No                                                    | No                                                | No                       | No                | 0                                               | 0                                                    | 0                                                                                                                                   | 0                                                      | 0.00                                                                                                          | 3.00                                                                                                                                                                                                                           | 0.00                                      | 12                                                                                                                                                           | 453                                                                    | PPE                                                             | No                                                                                   | No |
| 102 | Negative                               | M                            | 23      | Nurse                                              | Single                                                                            | Never                                                | Yes                                            | 23.88                            | 69     | 1.70   | No                                                    | No                                                | No                       | No                | 6                                               | 2                                                    | 8                                                                                                                                   | 10.00                                                  | 2.89                                                                                                          | 0.40                                                                                                                                                                                                                           | 12                                        | 350                                                                                                                                                          | PPE                                                                    | No                                                              | No                                                                                   |    |
| 103 | Negative                               | F                            | 29      | Nurse                                              | Single                                                                            | Never                                                | Yes                                            | 36.59                            | 107    | 1.71   | No                                                    | No                                                | No                       | No                | 5                                               | 2                                                    | 0                                                                                                                                   | 1                                                      | 1.00                                                                                                          | 1.00                                                                                                                                                                                                                           | 0.40                                      | 12                                                                                                                                                           | 72                                                                     | PPE                                                             | Yes                                                                                  | No |
| 104 | Negative                               | F                            | 44      | Nurse                                              | Single                                                                            | Never                                                | Yes                                            | 32.67                            | 79.5   | 1.56   | No                                                    | No                                                | No                       | No                | 80                                              | 4                                                    | 0                                                                                                                                   | 80                                                     | 3.11                                                                                                          | 0.00                                                                                                                                                                                                                           | 0.00                                      | 12                                                                                                                                                           | 392                                                                    | PPE                                                             | No                                                                                   | No |
| 105 | Negative                               | F                            | 62      | Administrative                                     | Common Union                                                                      | Never                                                | Yes                                            | 23.71                            | 63     | 1.63   | No                                                    | Yes                                               | No                       | No                | 10                                              | 0                                                    | 0                                                                                                                                   | 30                                                     | 2.00                                                                                                          | 0.00                                                                                                                                                                                                                           | 0.00                                      | 8                                                                                                                                                            | 0                                                                      | PPE                                                             | No                                                                                   | No |
| 106 | Negative                               | F                            | 30      | Nurse                                              | Common Union                                                                      | Never                                                | Yes                                            | 24.56                            | 59     | 1.55   | No                                                    | No                                                | No                       | No                | 2                                               | 0                                                    | 2                                                                                                                                   | 10                                                     | 2.00                                                                                                          | 2.00                                                                                                                                                                                                                           | 1.00                                      | 12                                                                                                                                                           | 90                                                                     | PPE                                                             | No                                                                                   | No |
| 107 | Negative                               | F                            | 32      | Nurse                                              | Married                                                                           | Never                                                | Yes                                            | 34.63                            | 80     | 1.52   | No                                                    | No                                                | No                       | No                | 5                                               | 0                                                    | 4                                                                                                                                   | 20                                                     | 2.00                                                                                                          | 0.00                                                                                                                                                                                                                           | 0.00                                      | 8                                                                                                                                                            | 44                                                                     | PPE                                                             | No                                                                                   | No |
| 108 | Negative                               | F                            | 32      | Administrative                                     | Single                                                                            | Never                                                | Yes                                            | 32.79                            | 85     | 1.61   | No                                                    | No                                                | No                       | No                | 6                                               | 2                                                    | 2                                                                                                                                   | 25                                                     | 2.00                                                                                                          | 0.00                                                                                                                                                                                                                           | 0.00                                      | 8                                                                                                                                                            | 9                                                                      | PPE                                                             | Yes                                                                                  | No |
| 109 | Negative                               | F                            | 33      | Administrative                                     | Married                                                                           | Never                                                | No                                             | 24.61                            | 63     | 1.60   | No                                                    | No                                                | No                       | No                | 5                                               | 1                                                    | 3                                                                                                                                   | 10                                                     | 1.00                                                                                                          | 1.00                                                                                                                                                                                                                           | 0.60                                      | 7                                                                                                                                                            | 20                                                                     | PPE                                                             | No                                                                                   | No |
| 110 | Negative                               | F                            | 32      | Administrative                                     | Common Union                                                                      | Never                                                | No                                             | 24.34                            | 60     | 1.57   | No                                                    | No                                                | No                       | No                | 5                                               | 2                                                    | 2                                                                                                                                   | 30                                                     | 2.00                                                                                                          | 2.00                                                                                                                                                                                                                           | 0.40                                      | 7                                                                                                                                                            | 0                                                                      | PPE                                                             | No                                                                                   | No |
| 111 | Negative                               | M                            | 41      | Nurse                                              | Common Union                                                                      | Never                                                | No                                             | 34.19                            | 117    | 1.85   | No                                                    | No                                                | Yes                      | No                | 5                                               | 1                                                    | 1                                                                                                                                   | 20                                                     | 3.00                                                                                                          | 3.00                                                                                                                                                                                                                           | 0.40                                      | 8                                                                                                                                                            | 90                                                                     | PPE                                                             | No                                                                                   | No |
| 112 | Negative                               | F                            | 40      | Nurse                                              | Single                                                                            | Never                                                | No                                             | 0.01                             | 135    | 1.58   | No                                                    | No                                                | No                       | No                | 5                                               | 2                                                    | 3                                                                                                                                   | 15                                                     | 1.00                                                                                                          | 0.00                                                                                                                                                                                                                           | 0.00                                      | 7                                                                                                                                                            | 0                                                                      | PPE                                                             | No                                                                                   | No |
| 113 | Negative                               | M                            | 36      | Nurse                                              | Single                                                                            | Never                                                | Yes                                            | 21.47                            | 65     | 1.74   | No                                                    | No                                                | No                       | No                | 3                                               | 1                                                    | 0                                                                                                                                   | -                                                      | 3.00                                                                                                          | 1.00                                                                                                                                                                                                                           | 0.40                                      | 12                                                                                                                                                           | 216                                                                    | PPE                                                             | No                                                                                   | No |
| 114 | Negative                               | F                            | 26      | Nurse                                              | Single                                                                            | Never                                                | No                                             | 18.36                            | 47     | 1.6    | No                                                    | No                                                | No                       | No                | 3                                               | 1                                                    | 1                                                                                                                                   | 6                                                      | 1.00                                                                                                          | 1.00                                                                                                                                                                                                                           | 0.40                                      | 12                                                                                                                                                           | 216                                                                    | PPE                                                             | No                                                                                   | No |
