# Supplementary material for: Evaluation of silver nanoparticles for the prevention of SARS-CoV-2 infection in health workers: In vitro and in vivo
Source: PubMed Central journal article supplement (PMC8375774; doi:10.1371/journal.pone.0256401), 2021-08-19
Supplement: pone.0256401.s003.pdf [file pone.0256401.s003.pdf]

| #   | COVID 19+ (Positive / Negative) | Gender (Female / Male) | Age (X) | Occupation (Doctor / Nurse / Administrative) | Marital Status (Single / Married / Common Union / Viudo / Divorced) | Smoking habits (Current / Previous / Never) | Seasonal Influenza Vaccine (Yes / No) | Body Mass Index (BMI), (X) | Weight | Height | Type 2 diabetes mellitus (DM), (Yes / No) | Arterial hypertension (HTN), (Yes / No) | Asthma, (Yes / No) | Other diseases | Hand washing before study protocol (X) | Daily gargles before the study protocol (X) | Frequency of upper respiratory tract infections before (last year) of being incorporated into the study protocol (X) | Hand washing during the study protocol (x) | Daily gargles with a conventional mouthwash during the study week (Daily average) | Direct daily application of the oral and nasal hygiene product during the study: | Daily nasal rinses with the oral and nasal hygiene product during the study week (Daily average) | Time in hours working in the HGT | How many patients were in contact with the diagnosis of atypical pneumonia or COVID-19 disease during the last week (Weekly Average) | What protective equipment was used to prevent infection | Had any symptoms of respiratory tract infections |
|-----|---------------------------------|------------------------|---------|----------------------------------------------|---------------------------------------------------------------------|---------------------------------------------|---------------------------------------|----------------------------|--------|--------|-------------------------------------------|-----------------------------------------|--------------------|----------------|----------------------------------------|---------------------------------------------|----------------------------------------------------------------------------------------------------------------------|--------------------------------------------|-----------------------------------------------------------------------------------|----------------------------------------------------------------------------------|--------------------------------------------------------------------------------------------------|----------------------------------|--------------------------------------------------------------------------------------------------------------------------------------|---------------------------------------------------------|--------------------------------------------------|
| 75  | Negative                        | M                      | 32      | Nurse                                        | Common Union                                                        | Never                                       | Yes                                   | 30.0                       | 93     | 1.76   | No                                        | No                                      | No                 | No             | 10                                     | 0                                           | 0                                                                                                                    | 20                                         | 0                                                                                 | 0                                                                                | 0                                                                                                | 12                               | 222                                                                                                                                  | PPE                                                     | No                                               |
| 76  | Negative                        | M                      | 28      | Nurse                                        | Single                                                              | Never                                       | Yes                                   | 32.7                       | 100    | 1.75   | No                                        | No                                      | No                 | Rhinitis       | 3                                      | 4                                           | 1                                                                                                                    | 20                                         | 2                                                                                 | 0                                                                                | 0                                                                                                | 12                               | 600                                                                                                                                  | PPE                                                     | No                                               |
| 77  | Negative                        | F                      | 36      | Nurse                                        | Married                                                             | Never                                       | Yes                                   | 32.0                       | 82     | 1.60   | No                                        | No                                      | No                 | No             | 10                                     | 0                                           | 2                                                                                                                    | 20                                         | 0                                                                                 | 0                                                                                | 0.2                                                                                              | 12                               | 206                                                                                                                                  | PPE                                                     | No                                               |
| 78  | Negative                        | F                      | 43      | Nurse                                        | Married                                                             | Never                                       | Yes                                   | 24.2                       | 70     | 1.70   | No                                        | No                                      | No                 | No             | 20                                     | 0                                           | 2                                                                                                                    | 40                                         | 0                                                                                 | 0                                                                                | 0                                                                                                | 12                               | 216                                                                                                                                  | PPE                                                     | No                                               |
| 79  | Negative                        | F                      | 22      | Nurse                                        | Single                                                              | Never                                       | Yes                                   | 33.0                       | 84.4   | 1.60   | No                                        | No                                      | No                 | No             | 20                                     | 0                                           | 2                                                                                                                    | 20                                         | 0                                                                                 | 0                                                                                | 0                                                                                                | 12                               | 140                                                                                                                                  | PPE                                                     | No                                               |
| 80  | Negative                        | F                      | 29      | Nurse                                        | Married                                                             | Never                                       | Yes                                   | 27.4                       | 65     | 1.54   | No                                        | No                                      | No                 | titis, bronc   | 20                                     | 0                                           | 2                                                                                                                    | 20                                         | 0                                                                                 | 0                                                                                | 0                                                                                                | 12                               | 207                                                                                                                                  | PPE                                                     | No                                               |
| 81  | Negative                        | F                      | 24      | Nurse                                        | Single                                                              | Never                                       | Yes                                   | 34.0                       | 87     | 1.60   | No                                        | No                                      | No                 | No             | 10                                     | 0                                           | 1                                                                                                                    | 20                                         | 0                                                                                 | 0                                                                                | 0                                                                                                | 12                               | 153                                                                                                                                  | PPE                                                     | No                                               |
| 82  | Negative                        | F                      | 42      | Nurse                                        | Married                                                             | Never                                       | Yes                                   | 33.3                       | 80     | 1.55   | No                                        | No                                      | No                 | No             | 3                                      | 0                                           | 0                                                                                                                    | 3                                          | 0                                                                                 | 0                                                                                | 0                                                                                                | 12                               | 195                                                                                                                                  | PPE                                                     | No                                               |
| 83  | Negative                        | M                      | 40      | Nurse                                        | Married                                                             | Never                                       | No                                    | 30.1                       | 81     | 1.64   | No                                        | No                                      | No                 | No             | 10                                     | 3                                           | 1                                                                                                                    | 20                                         | 2                                                                                 | 0                                                                                | 0                                                                                                | 12                               | 198                                                                                                                                  | PPE                                                     | No                                               |
| 84  | Negative                        | F                      | 49      | Nurse                                        | Single                                                              | Never                                       | No                                    | 30.0                       | 72     | 1.55   | No                                        | No                                      | No                 | No             | 0                                      | 0                                           | 0                                                                                                                    | 0                                          | 0                                                                                 | 0                                                                                | 0                                                                                                | 12                               | 216                                                                                                                                  | PPE                                                     | No                                               |
| 85  | Positive                        | M                      | 32      | Nurse                                        | Common Union                                                        | Previous                                    | Yes                                   | 30.80                      | 89     | 1.7    | No                                        | No                                      | No                 | No             | 15                                     | 0                                           | 2                                                                                                                    | 15                                         | 0                                                                                 | 0                                                                                | 0.2                                                                                              | 8                                | 24                                                                                                                                   | PPE                                                     | Yes                                              |
| 86  | Positive                        | F                      | 40      | Administrative                               | Married                                                             | Never                                       | Yes                                   | 27.03                      | 60     | 1.49   | No                                        | No                                      | No                 | No             | 18                                     | 0                                           | 0                                                                                                                    | 15                                         | 2                                                                                 | 0                                                                                | 0                                                                                                | 12                               | 5                                                                                                                                    | PPE                                                     | Yes                                              |
| 87  | Positive                        | M                      | 22      | Nurse                                        | Single                                                              | Current                                     | Yes                                   | 28.90                      | 88.5   | 1.75   | No                                        | No                                      | No                 | No             | 25                                     | 0                                           | 0                                                                                                                    | 25                                         | 0                                                                                 | 0                                                                                | 0                                                                                                | 8                                | 10                                                                                                                                   | PPE                                                     | Yes                                              |
| 88  | Positive                        | F                      | 26      | Nurse                                        | Single                                                              | Never                                       | No                                    | 24.22                      | 70     | 1.7    | No                                        | No                                      | No                 | No             | 10                                     | 0                                           | 0                                                                                                                    | 20                                         | 0                                                                                 | 0                                                                                | 0                                                                                                | 8                                | 6                                                                                                                                    | PPE                                                     | Yes                                              |
| 89  | Positive                        | F                      | 48      | Nurse                                        | Single                                                              | Never                                       | Yes                                   | 27.34                      | 70     | 1.6    | Yes                                       | No                                      | No                 | No             | 10                                     | 2                                           | 1                                                                                                                    | 10                                         | 2                                                                                 | 0                                                                                | 0                                                                                                | 8                                | 164                                                                                                                                  | PPE                                                     | Yes                                              |
| 90  | Positive                        | F                      | 56      | Nurse                                        | Single                                                              | Never                                       | No                                    | 21.88                      | 56     | 1.6    | No                                        | No                                      | No                 | No             | 10                                     | 0                                           | 1                                                                                                                    | 10                                         | 2                                                                                 | 0                                                                                | 0.4                                                                                              | 8                                | 0                                                                                                                                    | PPE                                                     | No                                               |
| 91  | Positive                        | F                      | 36      | Nurse                                        | Widowed                                                             | Never                                       | Yes                                   | 25.71                      | 70     | 1.65   | No                                        | No                                      | No                 | No             | 10                                     | 0                                           | 2                                                                                                                    | 10                                         | 0                                                                                 | 0                                                                                | 0                                                                                                | 12                               | 28                                                                                                                                   | PPE                                                     | Yes                                              |
| 92  | Positive                        | M                      | 37      | Nurse                                        | Married                                                             | Never                                       | Yes                                   | 36.33                      | 105    | 1.7    | Yes                                       | No                                      | No                 | No             | 10                                     | 0                                           | 0                                                                                                                    | 10                                         | 2                                                                                 | 0                                                                                | 0                                                                                                | 12                               | 30                                                                                                                                   | PPE                                                     | Yes                                              |
| 93  | Positive                        | F                      | 41      | Nurse                                        | Single                                                              | Never                                       | Yes                                   | 29.73                      | 79     | 1.63   | No                                        | No                                      | No                 | No             | 10                                     | 0                                           | 0                                                                                                                    | 10                                         | 2                                                                                 | 0                                                                                | 0                                                                                                | 12                               | 37                                                                                                                                   | PPE                                                     | Yes                                              |
| 94  | Positive                        | M                      | 35      | Nurse                                        | Married                                                             | Previous                                    | Yes                                   | 43.50                      | 117    | 1.64   | No                                        | No                                      | No                 | No             | 5                                      | 2                                           | 1                                                                                                                    | 20                                         | 0                                                                                 | 0                                                                                | 0                                                                                                | 12                               | 0                                                                                                                                    | PPE                                                     | No                                               |
| 95  | Positive                        | F                      | 34      | Nurse                                        | Married                                                             | Never                                       | No                                    | 35.36                      | 101    | 1.69   | No                                        | No                                      | No                 | No             | 10                                     | 0                                           | 1                                                                                                                    | 10                                         | 0                                                                                 | 0                                                                                | 0                                                                                                | 8                                | 0                                                                                                                                    | PPE                                                     | No                                               |
| 96  | Positive                        | F                      | 27      | Nurse                                        | Single                                                              | Never                                       | Yes                                   | 26.73                      | 80     | 1.73   | No                                        | No                                      | No                 | No             | 10                                     | 3                                           | 2                                                                                                                    | 20                                         | 2                                                                                 | 0                                                                                | 0.2                                                                                              | 12                               | 270                                                                                                                                  | PPE                                                     | Yes                                              |
| 97  | Positive                        | F                      | 40      | Nurse                                        | Single                                                              | Never                                       | Yes                                   | 23.44                      | 60     | 1.6    | No                                        | No                                      | No                 | No             | 10                                     | 1                                           | 1                                                                                                                    | 50                                         | 0                                                                                 | 0                                                                                | 0                                                                                                | 8                                | 7                                                                                                                                    | PPE                                                     | Yes                                              |
| 98  | Positive                        | F                      | 31      | Nurse                                        | Married                                                             | Never                                       | Yes                                   | 41.55                      | 96     | 1.52   | No                                        | No                                      | No                 | No             | 3                                      | 2                                           | 2                                                                                                                    | 3                                          | 2                                                                                 | 0                                                                                | 0                                                                                                | 7.5                              | 220                                                                                                                                  | PPE                                                     | Yes                                              |
| 99  | Positive                        | F                      | 30      | Nurse                                        | Single                                                              | Never                                       | Yes                                   | -                          | -      | -      | No                                        | No                                      | No                 | No             | -                                      | 0                                           | 1                                                                                                                    | -                                          | 0                                                                                 | 0                                                                                | 0.2                                                                                              | 8                                | 0                                                                                                                                    | PPE                                                     | No                                               |
| 100 | Positive                        | F                      | 40      | Nurse                                        | Married                                                             | Never                                       | Yes                                   | 23.34                      | 59     | 1.59   | No                                        | No                                      | No                 | No             | 3                                      | 0                                           | 1                                                                                                                    | 10                                         | 0                                                                                 | 0                                                                                | 0                                                                                                | 8                                | 0                                                                                                                                    | PPE                                                     | No                                               |
| 101 | Positive                        | F                      | 49      | Administrative                               | Married                                                             | Never                                       | Yes                                   | 29.07                      | 85     | 1.71   | No                                        | No                                      | No                 | No             | 20                                     | 0                                           | 0                                                                                                                    | 20                                         | 0                                                                                 | 0                                                                                | 0                                                                                                | 7                                | 0                                                                                                                                    | PPE                                                     | Yes                                              |
| 102 | Positive                        | F                      | 38      | Nurse                                        | Married                                                             | Never                                       | Yes                                   | 27.94                      | 68     | 1.56   | No                                        | No                                      | No                 | No             | 10                                     | 0                                           | 0                                                                                                                    | 24                                         | 0                                                                                 | 0                                                                                | 0.2                                                                                              | 8                                | 24                                                                                                                                   | PPE                                                     | Yes                                              |
| 103 | Positive                        | M                      | 39      | Nurse                                        | Married                                                             | Never                                       | Yes                                   | 29.06                      | 83     | 1.69   | No                                        | No                                      | No                 | No             | 4                                      | 0                                           | 0                                                                                                                    | 6                                          | 2                                                                                 | 0                                                                                | 0                                                                                                | 8                                | 51                                                                                                                                   | PPE                                                     | Yes                                              |
| 104 | Positive                        | M                      | 25      | Nurse                                        | Married                                                             | Never                                       | Yes                                   | 24.91                      | 72     | 1.7    | No                                        | No                                      | No                 | No             | 3                                      | 1                                           | 1                                                                                                                    | 3                                          | 0                                                                                 | 0                                                                                | 0                                                                                                | 8                                | 7                                                                                                                                    | PPE                                                     | Yes                                              |
| 105 | Positive                        | M                      | 41      | Doctor                                       | Married                                                             | Never                                       | Yes                                   | 40.75                      | 115    | 1.68   | No                                        | Yes                                     | No                 | No             | 3                                      | 0                                           | 0                                                                                                                    | 10                                         | 1                                                                                 | 0                                                                                | 0                                                                                                | 8                                | 240                                                                                                                                  | PPE                                                     | Yes                                              |
| 106 | Positive                        | F                      | 30      | Nurse                                        | Married                                                             | Never                                       | Yes                                   | 36.06                      | 60     | 1.29   | No                                        | No                                      | No                 | pothyroidis    | 10                                     | 0                                           | 0                                                                                                                    | 8                                          | 2                                                                                 | 0                                                                                | 0                                                                                                | 12                               | 66                                                                                                                                   | PPE                                                     | Yes                                              |
| 107 | Positive                        | M                      | 29      | Nurse                                        | Single                                                              | Current                                     | Yes                                   | 29.32                      | 95     | 1.8    | No                                        | No                                      | No                 | No             | 0                                      | 1                                           | 2                                                                                                                    | 1                                          | 0                                                                                 | 0                                                                                | 0.4                                                                                              | 12                               | 65                                                                                                                                   | PPE                                                     | Yes                                              |
| 108 | Positive                        | M                      | 30      | Nurse                                        | Single                                                              | Never                                       | No                                    | 31.25                      | 82     | 1.62   | No                                        | No                                      | No                 | No             | 10                                     | 0                                           | 0                                                                                                                    | 10                                         | 0                                                                                 | 0                                                                                | 0                                                                                                | 12                               | 60                                                                                                                                   | PPE                                                     | Yes                                              |
| 109 | Positive                        | F                      | 30      | Nurse                                        | Common Union                                                        | Previous                                    | Yes                                   | 25.86                      | 73     | 1.68   | No                                        | No                                      | No                 | No             | 0                                      | 0                                           | 3                                                                                                                    | 0                                          | 0                                                                                 | 0                                                                                | 0                                                                                                | 12                               | 36                                                                                                                                   | PPE                                                     | Yes                                              |
| 110 | Positive                        | F                      | 35      | Nurse                                        | Married                                                             | Never                                       | Yes                                   | 23.01                      | 56     | 1.56   | No                                        | No                                      | No                 | No             | 3                                      | 0                                           | 0                                                                                                                    | 2                                          | 0                                                                                 | 0                                                                                | 0                                                                                                | 12                               | 28                                                                                                                                   | PPE                                                     | Yes                                              |
| 111 | Positive                        | M                      | 21      | Nurse                                        | Single                                                              | Never                                       | Yes                                   | 23.31                      | 65     | 1.67   | No                                        | No                                      | No                 | No             | 10                                     | 0                                           | 3                                                                                                                    | 30                                         | 0                                                                                 | 0                                                                                | 0.2                                                                                              | 8                                | 252                                                                                                                                  | PPE                                                     | Yes                                              |
| 112 | Positive                        | F                      | 27      | Nurse                                        | Single                                                              | Never                                       | Yes                                   | 26.99                      | 64     | 1.54   | No                                        | No                                      | No                 | No             | 10                                     | 2                                           | 1                                                                                                                    | 15                                         | 2                                                                                 | 0                                                                                | 0                                                                                                | 8                                | 70                                                                                                                                   | PPE                                                     | Yes                                              |
| 113 | Positive                        | F                      | 29      | Nurse                                        | Married                                                             | Never                                       | No                                    | 25.10                      | 76     | 1.74   | No                                        | No                                      | No                 | No             | 10                                     | 0                                           | 0                                                                                                                    | 20                                         | 0                                                                                 | 0                                                                                | 0.4                                                                                              | 12                               | 0                                                                                                                                    | PPE                                                     | Yes                                              |
| 114 | Positive                        | F                      | 38      | Nurse                                        | Common Union                                                        | Previous                                    | Yes                                   | 32.88                      | 79     | 1.55   | No                                        | No                                      | No                 | No             | 10                                     | 0                                           | 1                                                                                                                    | 2                                          | 0                                                                                 | 0                                                                                | 0.4                                                                                              | 12                               | 30                                                                                                                                   | PPE                                                     | Yes                                              |
| 115 | Positive                        | F                      | 30      | Nurse                                        | Married                                                             | Never                                       | Yes                                   | 24.03                      | 60     | 1.58   | No                                        | No                                      | No                 | No             | 10                                     | 0                                           | 2                                                                                                                    | 20                                         | 0                                                                                 | 0                                                                                | 0                                                                                                | 12                               | 20                                                                                                                                   | PPE                                                     | Yes                                              |
| 116 | Positive                        | F                      | 32      | Nurse                                        | Single                                                              | Never                                       | No                                    | 22.66                      | 58     | 1.6    | No                                        | No                                      | No                 | No             | 6                                      | 1                                           | 2                                                                                                                    | 30                                         | 0                                                                                 | 0                                                                                | 0                                                                                                | 12                               | 22                                                                                                                                   | PPE                                                     | Yes                                              |
| 117 | Positive                        | M                      | 24      | Doctor                                       | Single                                                              | Previous                                    | Yes                                   | 26.56                      | 68     | 1.6    | No                                        | No                                      | No                 | No             | 6                                      | 0                                           | 1                                                                                                                    | 30                                         | 2                                                                                 | 0                                                                                | 0.2                                                                                              | 12                               | 64                                                                                                                                   | PPE                                                     | Yes                                              |
