# Supplementary material for: Evaluation of silver nanoparticles for the prevention of SARS-CoV-2 infection in health workers: In vitro and in vivo
Source: PLoS One. 2021 Aug 19;16(8):e0256401. doi: 10.1371/journal.pone.0256401 (PMC8375774; doi:10.1371/journal.pone.0256401)
Supplement: S1 File — (PDF) [file pone.0256401.s001.pdf]

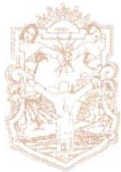**SS**

SECRETARÍA DE SALUD

GOBIERNO DE BAJA CALIFORNIA

ENTIDAD: Instituto de Servicios de Salud  
Pública del Estado de Baja California.  
SECCIÓN: Hospital General Tijuana  
SUBSECCIÓN: Departamento de Enseñanza  
NUMERO DE OFICIO: 230

Tijuana B.C a 22 de abril de 2020

**Dr. Horacio Almanza Reyes.**  
**Investigador principal**  
**Presente.**

Estimado Dr. **Almanza Reyes**

Por este conducto informamos a Usted, que el Comité de Ética en Investigación del Hospital General de Tijuana, con dictamen favorable Número CONBIOETICA-02-CEI-001-20170, en la reunión celebrada el día 7 de abril de 2020, habiendo analizado detalladamente ha aprobado la siguiente documentación.

Nombre del Estudio de Investigación: **Evaluación del uso de nanopartículas de plata como producto de higiene bucofaringeo (enjuague bucal) y nasal, por parte del personal de salud que labora en el Hospital General Tijuana expuesto a pacientes con diagnóstico de neumonías atípicas por el SARS-Coronavirus-2.**

Número de Protocolo:

Empresa Patrocinadora del Estudio de Investigación:

| ID | Nombre del documento                  | Versión | Idioma  | Fecha     |
|----|---------------------------------------|---------|---------|-----------|
| 1  | Protocolo en extenso                  | final   | Español | 7/04/2020 |
| 2  | Curriculum del investigador principal | N/A     | Español | 2020      |
| 3  |                                       |         | Español |           |

Estamos de acuerdo en que sea Usted, **Dr. Horacio Almanza Reyes.**, el Investigador Principal de dicho protocolo, el cual podrá ser desarrollado bajo las normas internacionales de ética y buena práctica clínica, debiendo reportar los avances hasta el cierre del protocolo

Sin más por el momento, agradezco su amable atención, y envío un cordial saludo.

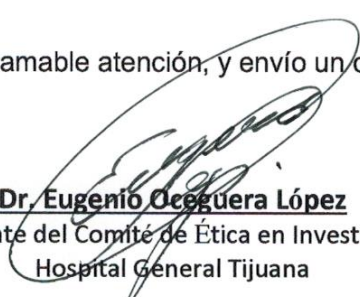

**Dr. Eugenio Ocegüera López**

Presidente del Comité de Ética en Investigación  
Hospital General Tijuana

C.c.p. Minutario de Comité Ética en Investigación

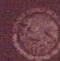**SALUD**  
SECRETARÍA DE SALUD
